# Supplementary material for: Prenatal Cadmium Exposure and Maternal Sex Steroid Hormone Concentrations across Pregnancy
Source: MDPI journal article supplement (doi:10.3390/toxics11070589), 2023-07-06
Supplement: s1 [file s1]

# Supplementary Materials: Prenatal Cadmium Exposure and Maternal Sex Steroid Hormone Concentrations across Pregnancy

Zorimar Rivera-Núñez, Megan Hansel, Camila Capurro, Danielle Kozlosky, Christina Wang, Cathleen L. Doherty, Brian Buckley, Pamela Ohman-Strickland, Richard K. Miller, Thomas G. O'Connor, Lauren M. Aleksunes and Emily S. Barrett

**Table S1.** Linear mixed models examining associations between urinary cadmium and sex steroid hormone concentrations in pregnancy overall and stratified by fetal sex.

| Cadmium (ppb)                        | n   | Total Testosterone (ng/dl) |                        | Free Testosterone (ng/dl)             |                                        | Estrone (pg/ml)         |                         | Estradiol (pg/ml)      |                        | Estriol (pg/ml)         |                        |
|--------------------------------------|-----|----------------------------|------------------------|---------------------------------------|----------------------------------------|-------------------------|-------------------------|------------------------|------------------------|-------------------------|------------------------|
|                                      |     | Unadjusted                 | Adjusted               | Unadjusted                            | Adjusted                               | Unadjusted              | Adjusted                | Unadjusted             | Adjusted               | Unadjusted              | Adjusted               |
|                                      |     | Model                      | Model <sup>1</sup>     | Model                                 | Model <sup>1</sup>                     | Model                   | Model <sup>2</sup>      | Model                  | Model <sup>2</sup>     | Model                   | Model <sup>2</sup>     |
|                                      |     | %Δ<br>(95% CI)             | %Δ<br>(95% CI)         | %Δ<br>(95% CI)                        | %Δ<br>(95% CI)                         | %Δ<br>(95% CI)          | %Δ<br>(95% CI)          | %Δ<br>(95% CI)         | %Δ<br>(95% CI)         | %Δ<br>(95% CI)          | %Δ<br>(95% CI)         |
| All participants                     | 272 | 0.02<br>(-5.37, 5.72)      | 0.38<br>(-5.10, 6.18)  | <b>-4.61</b><br><b>(-7.62, -1.51)</b> | <b>-5.19</b><br><b>(-8.33, -1.93)</b>  | -2.86<br>(-8.39, 3.02)  | -1.24<br>(-6.57, 4.39)  | -2.08<br>(-6.22, 2.24) | 0.11<br>(-3.55, 3.90)  | -0.85<br>(-6.52, 5.16)  | 0.50<br>(-5.09, 6.43)  |
| Participants carrying male fetuses   | 138 | 2.38<br>(-5.42, 10.83)     | 1.83<br>(-6.02, 10.34) | -4.13<br>(-8.12, 0.03)                | -4.39<br>(-8.75, 0.19)                 | -4.49<br>(-12.39, 4.13) | -5.28<br>(-12.69, 2.75) | -1.86<br>(-7.67, 4.32) | -0.99<br>(-6.10, 4.39) | 0.82<br>(-6.70, 8.94)   | -0.06<br>(-7.61, 8.11) |
| Participants carrying female fetuses | 134 | -2.82<br>(-10.09, 5.04)    | -0.21<br>(-7.84, 8.05) | <b>-5.21</b><br><b>(-9.72, -0.48)</b> | <b>-6.51</b><br><b>(-11.11, -1.68)</b> | -0.16<br>(-7.65, 7.94)  | 3.65<br>(-3.70, 11.57)  | -1.64<br>(-7.41, 4.50) | 1.93<br>(-3.20, 7.33)  | -2.77<br>(-10.93, 6.13) | 2.49<br>(-5.55, 11.22) |

<sup>1</sup>Adjusted for maternal age, gestational age deviation, maternal race, maternal ethnicity, highest maternal education, pre-pregnancy BMI.

<sup>2</sup>Adjusted for maternal age, gestational age deviation, maternal race, maternal ethnicity, highest maternal education, pre-pregnancy BMI, fetal sex, parity, maternal smoking during pregnancy.

**Table S2.** *P*-values for cross-product terms of cadmium by fetal sex in linear mixed models.

| Outcome                         | Exposure | Fetal Sex ( <i>p</i> -value) |
|---------------------------------|----------|------------------------------|
| Total Testosterone <sup>1</sup> | Cadmium  | 0.76                         |
| Free Testosterone <sup>1</sup>  | Cadmium  | 0.98                         |
| Estrone <sup>2</sup>            | Cadmium  | 0.04                         |
| Estradiol <sup>2</sup>          | Cadmium  | 0.04                         |
| Estriol <sup>2</sup>            | Cadmium  | 0.35                         |

<sup>1</sup>Adjusted for maternal age, gestational age deviation, maternal race, maternal ethnicity, highest maternal education, pre-pregnancy BMI.

<sup>2</sup>Adjusted for maternal age, gestational age deviation, maternal race, maternal ethnicity, highest maternal education, pre-pregnancy BMI, fetal sex, parity, maternal smoking during pregnancy.

**Table S3.** Adjusted linear mixed models examining associations between urinary cadmium and sex steroid hormone concentrations in pregnancy, excluding smokers and participants with pregnancy complications.

|                                                             | Total Testosterone <sup>1</sup> | Free Testosterone <sup>1</sup> | Estrone <sup>2</sup> | Estradiol <sup>2</sup> | Estriol <sup>2</sup> |
|-------------------------------------------------------------|---------------------------------|--------------------------------|----------------------|------------------------|----------------------|
|                                                             | %Δ                              | %Δ                             | %Δ                   | %Δ                     | %Δ                   |
|                                                             | (95% CI)                        | (95% CI)                       | (95% CI)             | (95% CI)               | (95% CI)             |
| Cadmium (ppb)                                               |                                 |                                |                      |                        |                      |
| Excluding smokers <sup>3</sup>                              | 1.38                            | <b>-5.33</b>                   | -0.39                | 0.07                   | 0.55                 |
| (n=254)                                                     | (-4.20, 7.29)                   | <b>(-8.57, -1.98)</b>          | (-5.93, 5.47)        | (-3.70, 3.99)          | (-5.14, 6.59)        |
| Excluding participants with pregnancy complications (n=237) | -2.26                           | <b>-3.74</b>                   | -1.32                | -0.13                  | 1.17                 |
|                                                             | (-8.00, 3.85)                   | <b>(-7.22, -0.13)</b>          | (-6.86, 4.56)        | (-4.03, 3.92)          | (-4.91, 7.65)        |

<sup>1</sup>Adjusted for maternal age, gestational age deviation, maternal race, maternal ethnicity, highest maternal education, pre-pregnancy BMI.

<sup>2</sup>Adjusted for maternal age, gestational age deviation, maternal race, maternal ethnicity, highest maternal education, pre-pregnancy BMI, fetal sex, parity, maternal smoking during pregnancy.

<sup>3</sup>Not adjusted for maternal smoking during pregnancy.

**Table S4.** Adjusted<sup>1</sup> linear regression models examining associations between maternal urinary cadmium and serum testosterone concentrations by trimester, overall and stratified by fetal sex.

| Cadmium (ppb)                        | Total Testosterone |                        |                 | Free Testosterone |                |                        |
|--------------------------------------|--------------------|------------------------|-----------------|-------------------|----------------|------------------------|
|                                      | Trimester 1        | Trimester 2            | Trimester 3     | Trimester 1       | Trimester 2    | Trimester 3            |
|                                      | (n=261)            | (n=264)                | (n=266)         | (n=261)           | (n=264)        | (n=266)                |
| Overall                              |                    |                        |                 |                   |                |                        |
| %Δ                                   | -8.30              | <b>-15.26</b>          | 4.37            | -3.75             | 0.96           | <b>-14.35</b>          |
| (95% CI)                             | (-18.00, 2.54)     | <b>(-25.15, -4.06)</b> | (-9.94, 20.95)  | (-8.64, 1.40)     | (-4.27, 6.48)  | <b>(-19.75, -8.59)</b> |
| Participants carrying male fetuses   |                    |                        |                 |                   |                |                        |
| %Δ                                   | -2.20              | -13.73                 | -8.68           | -3.69             | 3.48           | <b>-11.23</b>          |
| (95% CI)                             | (-16.31, 14.29)    | (-28.40, 3.95)         | (-26.51, 13.46) | (-10.40, 3.51)    | (-3.73, 11.24) | <b>(-18.81, -2.96)</b> |
| Participants carrying female fetuses |                    |                        |                 |                   |                |                        |
| %Δ                                   | -13.85             | <b>-15.98</b>          | 19.29           | -4.71             | -1.23          | <b>-17.70</b>          |
| (95% CI)                             | (-27.21, 1.95)     | <b>(-29.31, -0.14)</b> | (-3.01, 46.72)  | (-12.19, 3.41)    | (-9.04, 7.25)  | <b>(-25.07, -9.61)</b> |

<sup>1</sup>Adjusted for maternal age, gestational age at trimester visit, maternal race, maternal ethnicity, highest maternal education, pre-pregnancy BMI.

**Table S5.** Adjusted<sup>1</sup> linear regression models examining associations between maternal urinary cadmium and estrogen concentrations by trimester.

| <b>Cadmium (ppb)</b>                 | <b>Estrone</b>         |                        |                        | <b>Estradiol</b>       |                        |                        | <b>Estriol</b>          |                        |                        |
|--------------------------------------|------------------------|------------------------|------------------------|------------------------|------------------------|------------------------|-------------------------|------------------------|------------------------|
| Overall                              | Trimester 1<br>(n=261) | Trimester 2<br>(n=264) | Trimester 3<br>(n=266) | Trimester 1<br>(n=261) | Trimester 2<br>(n=264) | Trimester 3<br>(n=266) | Trimester 1<br>(n=239)  | Trimester 2<br>(n=264) | Trimester 3<br>(n=266) |
| %Δ                                   | -1.71                  | -3.80                  | -4.69                  | 2.78                   | -4.12                  | -2.00                  | -1.31                   | 0.45                   | 3.31                   |
| (95% CI)                             | (-13.67, 11.92)        | (-15.60, 9.66)         | (-18.27, 11.15)        | (-5.91, 12.28)         | (-11.16, 3.48)         | (-10.01, 6.72)         | (-18.49, 19.49)         | (-6.92, 8.40)          | (-5.69, 13.16)         |
| Participants carrying male fetuses   | Trimester 1<br>(n=133) | Trimester 2<br>(n=134) | Trimester 3<br>(n=136) | Trimester 1<br>(n=133) | Trimester 2<br>(n=134) | Trimester 3<br>(n=136) | Trimester 1<br>(n=122)  | Trimester 2<br>(n=134) | Trimester 3<br>(n=136) |
| %Δ                                   | -2.64                  | -9.07                  | -4.12                  | -0.98                  | -5.58                  | -6.05                  | -6.85                   | -0.67                  | 3.15                   |
| (95% CI)                             | (-17.53, 14.95)        | (-25.01, 10.24)        | (-23.85, 20.74)        | (-12.01, 11.43)        | (-15.64, 5.68)         | (-17.68, 7.22)         | (-29.66, 23.36)         | (-9.89, 9.49)          | (-10.56, 18.96)        |
| Participants carrying female fetuses | Trimester 1<br>(n=128) | Trimester 2<br>(n=130) | Trimester 3<br>(n=130) | Trimester 1<br>(n=128) | Trimester 2<br>(n=130) | Trimester 3<br>(n=130) | Trimester 1<br>(n=1117) | Trimester 2<br>(n=130) | Trimester 3<br>(n=130) |
| %Δ                                   | -1.63                  | 3.66                   | -4.36                  | 8.59                   | -1.42                  | 1.49                   | 1.10                    | 1.50                   | 3.66                   |
| (95% CI)                             | (-20.67, 21.98)        | (-13.83, 24.69)        | (-23.15, 19.03)        | (-5.74, 25.10)         | (-11.49, 9.80)         | (-9.41, 13.71)         | (-24.01, 34.50)         | (-10.33, 14.90)        | (-8.40, 17.32)         |

<sup>1</sup>Adjusted for maternal age, gestational age at trimester visit, maternal race, maternal ethnicity, highest maternal education, pre-pregnancy BMI, fetal sex, parity, maternal smoking during pregnancy.

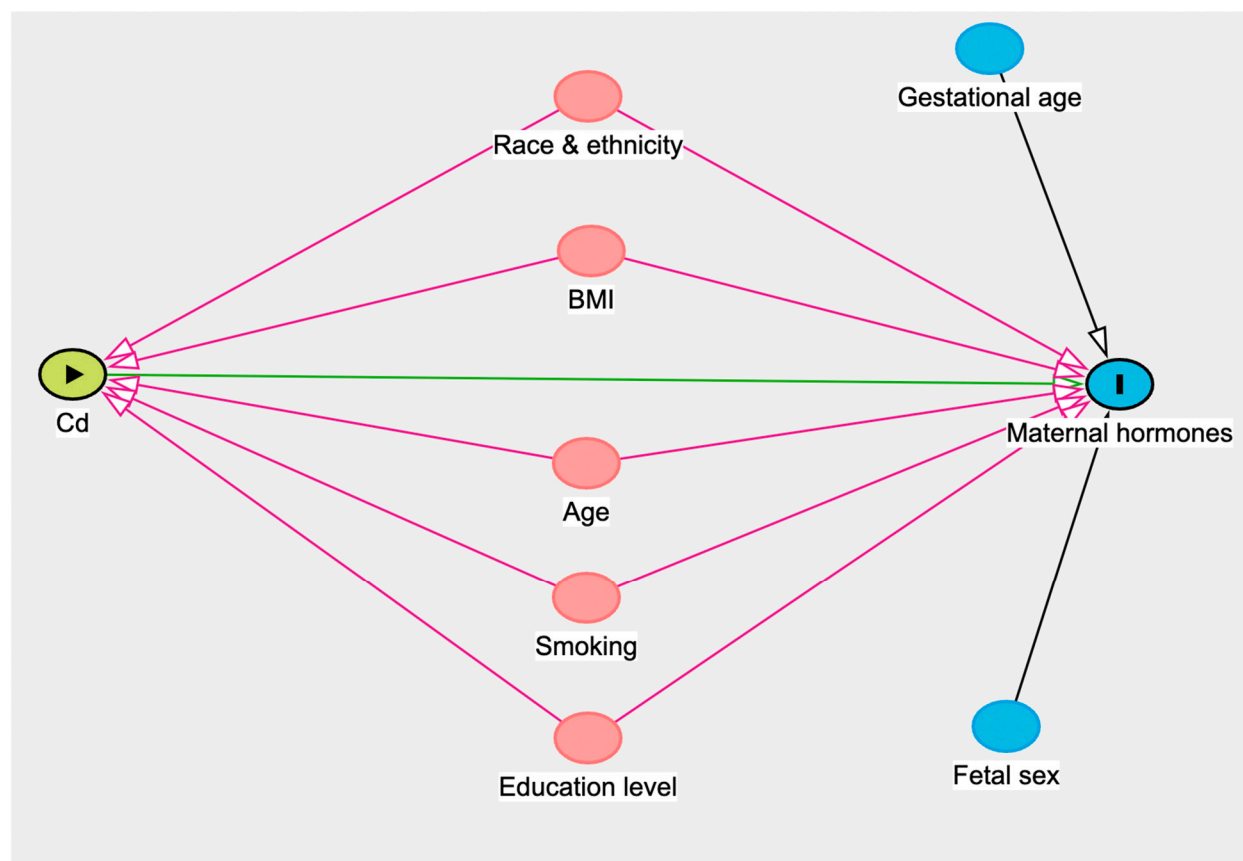

**Figure S1.** Directed acyclic graph (DAG) for the association between prenatal cadmium exposure and maternal sex steroid hormones.
